# Supplementary material
Source: PubMed Central journal article supplement (PMC2716963)

# Supplemental Figure 1

## Capan-1 spheroids

## PaCa-3 spheroids

### A H&E stain

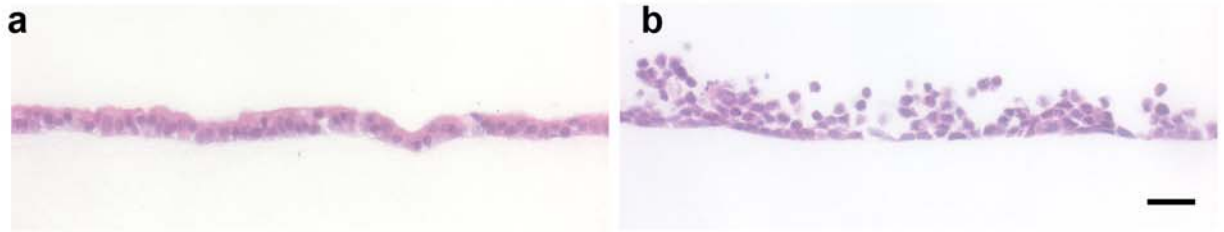

### B Total counts

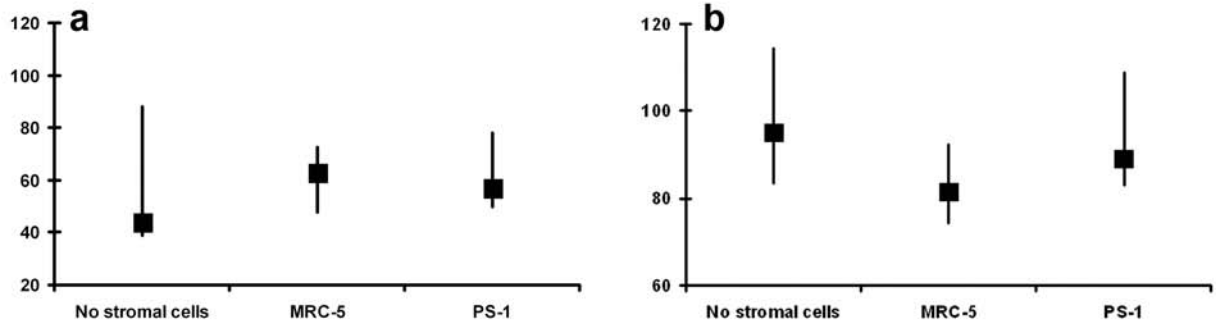

### C % Ki67 positive cells

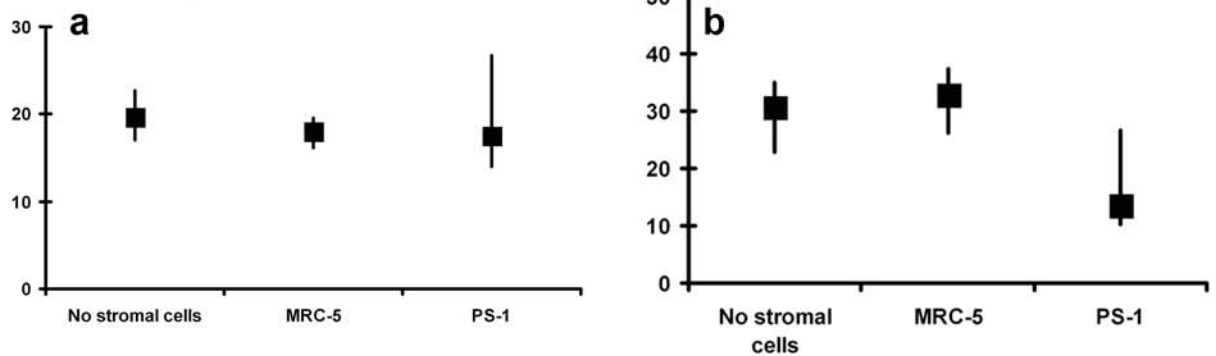

### D % Caspase-3 positive cells

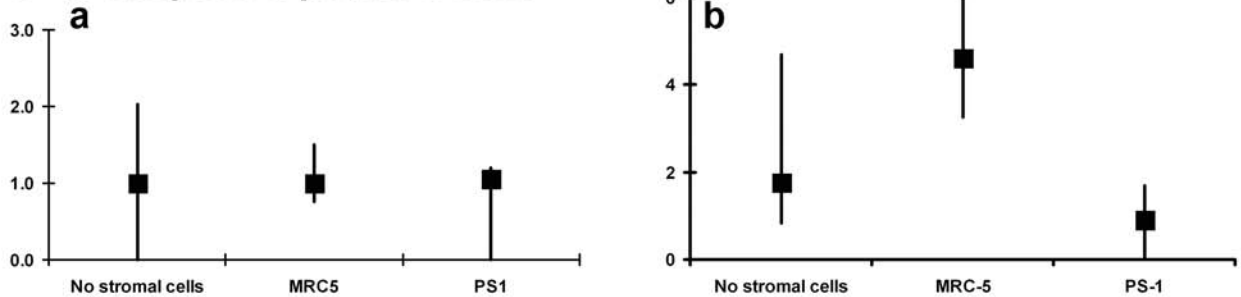

### E Capan-1 cells

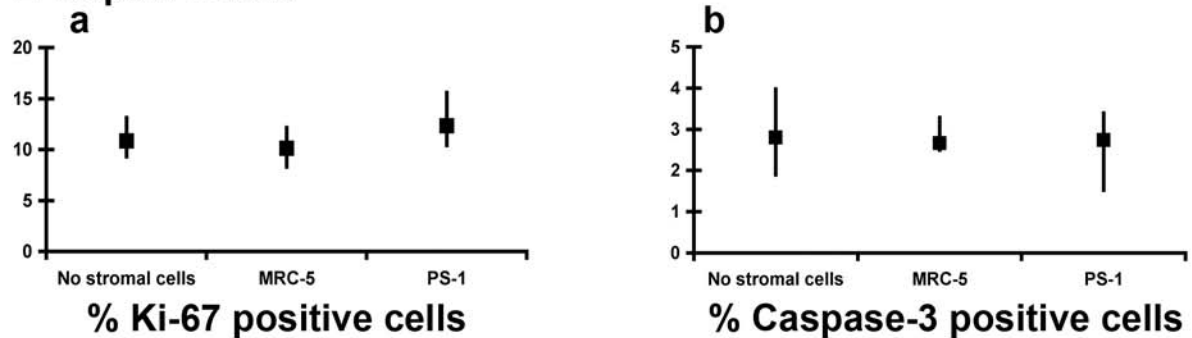

Supplement: ajpath.2009.090131_1.pdf [file ajpath.2009.090131_1.pdf]
